# Supplementary material for: Hyperdense Pancreatic Ductal Adenocarcinoma: Clinical Characteristics and Proteomic Landscape
Source: Front Oncol. 2021 Feb 25;11:640820. doi: 10.3389/fonc.2021.640820 (PMC7947874; doi:10.3389/fonc.2021.640820)
Supplement: Supplementary file 2 [file Table_2.xlsx]

## Sheet: differentially expressed pro
Protein accession	Protein description	Gene name	hypo/hyper Ratio	hypo/hyper P value	Regulated Type	MW [kDa]	Coverage [%]	Peptides	Unique peptides	PSMs	Subcellular localization	KEGG KO No.	KEGG Gene	KEGG pathway	Biological Process	Cellular Component	Molecular Function	Pfam ID	Domain description
Q9P2X0	Dolichol-phosphate mannosyltransferase subunit 3 OS=Homo sapiens OX=9606 GN=DPM3 PE=1 SV=2	DPM3	1.489	0.0453527	Up	10.094	10.9	1	1	1	extracellular	K09659	DPM3; dolichol-phosphate mannosyltransferase subunit 3	map00510 N-Glycan biosynthesis; map01100 Metabolic pathways	GO:0005975 carbohydrate metabolic process; GO:0006464 cellular protein modification process; GO:0006486 protein glycosylation; GO:0006493 protein O-linked glycosylation; GO:0006497 protein lipidation; GO:0006505 GPI anchor metabolic process; GO:0006506 GPI anchor biosynthetic process; GO:0006629 lipid metabolic process; GO:0006643 membrane lipid metabolic process; GO:0006644 phospholipid metaboli…	GO:0005622 intracellular; GO:0005623 cell; GO:0005737 cytoplasm; GO:0005783 endoplasmic reticulum; GO:0005789 endoplasmic reticulum membrane; GO:0012505 endomembrane system; GO:0016020 membrane; GO:0016021 integral component of membrane; GO:0030176 integral component of endoplasmic reticulum membrane; GO:0031224 intrinsic component of membrane; GO:0031227 intrinsic component of endoplasmic reticu…
P27338	Amine oxidase [flavin-containing] B OS=Homo sapiens OX=9606 GN=MAOB PE=1 SV=3	MAOB	0.709	0.0241739	Down	58.762	28.7	14	13	20	cytoplasm	K00274	MAO, aofH; monoamine oxidase [EC:1.4.3.4]	map00260 Glycine, serine and threonine metabolism; map00330 Arginine and proline metabolism; map00340 Histidine metabolism; map00350 Tyrosine metabolism; map00360 Phenylalanine metabolism; map00380 Tryptophan metabolism; map00982 Drug metabolism - cytochrome P450; map01100 Metabolic pathways; map04726 Serotonergic synapse; map04728 Dopaminergic synapse; map05030 Cocaine addiction; map05031 Amphet…	GO:0001505 regulation of neurotransmitter levels; GO:0002237 response to molecule of bacterial origin; GO:0006091 generation of precursor metabolites and energy; GO:0006584 catecholamine metabolic process; GO:0006725 cellular aromatic compound metabolic process; GO:0006807 nitrogen compound metabolic process; GO:0008152 metabolic process; GO:0009056 catabolic process; GO:0009058 biosynthetic proc…	GO:0005622 intracellular; GO:0005623 cell; GO:0005737 cytoplasm; GO:0005739 mitochondrion; GO:0005740 mitochondrial envelope; GO:0005741 mitochondrial outer membrane; GO:0016020 membrane; GO:0019867 outer membrane; GO:0031090 organelle membrane; GO:0031966 mitochondrial membrane; GO:0031967 organelle envelope; GO:0031968 organelle outer membrane; GO:0031975 envelope; GO:0043226 organelle; GO:0043…	GO:0000166 nucleotide binding; GO:0003824 catalytic activity; GO:0005488 binding; GO:0005515 protein binding; GO:0008131 primary amine oxidase activity; GO:0009055 electron carrier activity; GO:0016491 oxidoreductase activity; GO:0016638 oxidoreductase activity, acting on the CH-NH2 group of donors; GO:0016641 oxidoreductase activity, acting on the CH-NH2 group of donors, oxygen as acceptor; GO:0…	PF01593	Flavin containing amine oxidoreductase
P54922	[Protein ADP-ribosylarginine] hydrolase OS=Homo sapiens OX=9606 GN=ADPRH PE=1 SV=1	ADPRH	0.667	0.0311302	Down	39.506	5	1	1	1	mitochondria	K01245	ADPRH; ADP-ribosylarginine hydrolase [EC:3.2.2.19]		GO:0006464 cellular protein modification process; GO:0006807 nitrogen compound metabolic process; GO:0008152 metabolic process; GO:0009987 cellular process; GO:0019538 protein metabolic process; GO:0036211 protein modification process; GO:0043170 macromolecule metabolic process; GO:0043412 macromolecule modification; GO:0044237 cellular metabolic process; GO:0044238 primary metabolic process; GO:…	GO:0005622 intracellular; GO:0005623 cell; GO:0044464 cell part;	GO:0000287 magnesium ion binding; GO:0003824 catalytic activity; GO:0003875 ADP-ribosylarginine hydrolase activity; GO:0005488 binding; GO:0016787 hydrolase activity; GO:0016798 hydrolase activity, acting on glycosyl bonds; GO:0016799 hydrolase activity, hydrolyzing N-glycosyl compounds; GO:0030955 potassium ion binding; GO:0031420 alkali metal ion binding; GO:0043167 ion binding; GO:0043169 cati…
A0A075B6J9	Immunoglobulin lambda variable 2-18 OS=Homo sapiens OX=9606 GN=IGLV2-18 PE=3 SV=2	IGLV2-18	1.746	0.0399176	Up	12.412	11	1	1	2	extracellular							PF07686	Immunoglobulin V-set domain
O60244	Mediator of RNA polymerase II transcription subunit 14 OS=Homo sapiens OX=9606 GN=MED14 PE=1 SV=2	MED14	3.622	9.67274e-08	Up	160.6	1.2	2	2	2	nucleus	K15156	MED14, RGR1; mediator of RNA polymerase II transcription subunit 14	map04919 Thyroid hormone signaling pathway	GO:0006139 nucleobase-containing compound metabolic process; GO:0006351 transcription, DNA-templated; GO:0006352 DNA-templated transcription, initiation; GO:0006355 regulation of transcription, DNA-templated; GO:0006357 regulation of transcription from RNA polymerase II promoter; GO:0006366 transcription from RNA polymerase II promoter; GO:0006367 transcription initiation from RNA polymerase II p…	GO:0000428 DNA-directed RNA polymerase complex; GO:0005622 intracellular; GO:0005623 cell; GO:0005634 nucleus; GO:0005654 nucleoplasm; GO:0005667 transcription factor complex; GO:0016591 DNA-directed RNA polymerase II, holoenzyme; GO:0016592 mediator complex; GO:0030880 RNA polymerase complex; GO:0031974 membrane-enclosed lumen; GO:0031981 nuclear lumen; GO:0032991 macromolecular complex; GO:0043…	GO:0003712 transcription cofactor activity; GO:0003713 transcription coactivator activity; GO:0005102 receptor binding; GO:0005488 binding; GO:0005515 protein binding; GO:0008134 transcription factor binding; GO:0030374 ligand-dependent nuclear receptor transcription coactivator activity; GO:0035257 nuclear hormone receptor binding; GO:0038023 signaling receptor activity; GO:0042809 vitamin D rec…
Q14566	DNA replication licensing factor MCM6 OS=Homo sapiens OX=9606 GN=MCM6 PE=1 SV=1	MCM6	0.665	0.00338829	Down	92.888	2.9	3	3	3	nucleus	K02542	MCM6; DNA replication licensing factor MCM6 [EC:3.6.4.12]	map03030 DNA replication; map04110 Cell cycle	GO:0000082 G1/S transition of mitotic cell cycle; GO:0000278 mitotic cell cycle; GO:0006139 nucleobase-containing compound metabolic process; GO:0006259 DNA metabolic process; GO:0006260 DNA replication; GO:0006261 DNA-dependent DNA replication; GO:0006268 DNA unwinding involved in DNA replication; GO:0006725 cellular aromatic compound metabolic process; GO:0006807 nitrogen compound metabolic pro…	GO:0005622 intracellular; GO:0005623 cell; GO:0005634 nucleus; GO:0005654 nucleoplasm; GO:0031974 membrane-enclosed lumen; GO:0031981 nuclear lumen; GO:0032991 macromolecular complex; GO:0042555 MCM complex; GO:0043226 organelle; GO:0043227 membrane-bounded organelle; GO:0043229 intracellular organelle; GO:0043231 intracellular membrane-bounded organelle; GO:0043233 organelle lumen; GO:0044422 or…	GO:0000166 nucleotide binding; GO:0003676 nucleic acid binding; GO:0003677 DNA binding; GO:0003697 single-stranded DNA binding; GO:0005488 binding; GO:0005515 protein binding; GO:0005524 ATP binding; GO:0008144 drug binding; GO:0017076 purine nucleotide binding; GO:0030554 adenyl nucleotide binding; GO:0032553 ribonucleotide binding; GO:0032555 purine ribonucleotide binding; GO:0032559 adenyl rib…	PF00493	MCM2/3/5 family
Q8IZ52	Chondroitin sulfate synthase 2 OS=Homo sapiens OX=9606 GN=CHPF PE=1 SV=2	CHPF	1.308	0.00512274	Up	85.466	1.5	1	1	2	extracellular	K00747	CHPF; chondroitin polymerizing factor [EC:2.4.1.175 2.4.1.226]	map00532 Glycosaminoglycan biosynthesis - chondroitin sulfate / dermatan sulfate; map01100 Metabolic pathways	GO:0006022 aminoglycan metabolic process; GO:0006023 aminoglycan biosynthetic process; GO:0006024 glycosaminoglycan biosynthetic process; GO:0006029 proteoglycan metabolic process; GO:0006082 organic acid metabolic process; GO:0006790 sulfur compound metabolic process; GO:0006807 nitrogen compound metabolic process; GO:0008152 metabolic process; GO:0009058 biosynthetic process; GO:0009059 macromo…	GO:0000139 Golgi membrane; GO:0005622 intracellular; GO:0005623 cell; GO:0005737 cytoplasm; GO:0005794 Golgi apparatus; GO:0012505 endomembrane system; GO:0016020 membrane; GO:0031090 organelle membrane; GO:0031984 organelle subcompartment; GO:0043226 organelle; GO:0043227 membrane-bounded organelle; GO:0043229 intracellular organelle; GO:0043231 intracellular membrane-bounded organelle; GO:00444…	GO:0003824 catalytic activity; GO:0008194 UDP-glycosyltransferase activity; GO:0008376 acetylgalactosaminyltransferase activity; GO:0015020 glucuronosyltransferase activity; GO:0016740 transferase activity; GO:0016757 transferase activity, transferring glycosyl groups; GO:0016758 transferase activity, transferring hexosyl groups; GO:0047238 glucuronosyl-N-acetylgalactosaminyl-proteoglycan 4-beta-…
Q9BYK8	Helicase with zinc finger domain 2 OS=Homo sapiens OX=9606 GN=HELZ2 PE=1 SV=6	HELZ2	0.752	0.0434945	Down	294.65	1.2	3	3	3	nucleus				GO:0006355 regulation of transcription, DNA-templated; GO:0006357 regulation of transcription from RNA polymerase II promoter; GO:0009889 regulation of biosynthetic process; GO:0009891 positive regulation of biosynthetic process; GO:0009893 positive regulation of metabolic process; GO:0010468 regulation of gene expression; GO:0010556 regulation of macromolecule biosynthetic process; GO:0010557 po…	GO:0005622 intracellular; GO:0005623 cell; GO:0005634 nucleus; GO:0005654 nucleoplasm; GO:0031974 membrane-enclosed lumen; GO:0031981 nuclear lumen; GO:0043226 organelle; GO:0043227 membrane-bounded organelle; GO:0043229 intracellular organelle; GO:0043231 intracellular membrane-bounded organelle; GO:0043233 organelle lumen; GO:0044422 organelle part; GO:0044424 intracellular part; GO:0044428 nuc…	GO:0003712 transcription cofactor activity; GO:0003713 transcription coactivator activity; GO:0030374 ligand-dependent nuclear receptor transcription coactivator activity;	PF13086; PF13087; PF00773	AAA domain; AAA domain; RNB domain
P08236	Beta-glucuronidase OS=Homo sapiens OX=9606 GN=GUSB PE=1 SV=2	GUSB	0.723	0.0388137	Down	74.731	12.9	8	8	12	nucleus	K01195	uidA, GUSB; beta-glucuronidase [EC:3.2.1.31]	map00040 Pentose and glucuronate interconversions; map00531 Glycosaminoglycan degradation; map00860 Porphyrin and chlorophyll metabolism; map00983 Drug metabolism - other enzymes; map01100 Metabolic pathways; map04142 Lysosome	GO:0001775 cell activation; GO:0002252 immune effector process; GO:0002263 cell activation involved in immune response; GO:0002274 myeloid leukocyte activation; GO:0002275 myeloid cell activation involved in immune response; GO:0002283 neutrophil activation involved in immune response; GO:0002366 leukocyte activation involved in immune response; GO:0002376 immune system process; GO:0002443 leukoc…	GO:0000323 lytic vacuole; GO:0005576 extracellular region; GO:0005615 extracellular space; GO:0005622 intracellular; GO:0005623 cell; GO:0005737 cytoplasm; GO:0005764 lysosome; GO:0005766 primary lysosome; GO:0005773 vacuole; GO:0005775 vacuolar lumen; GO:0012505 endomembrane system; GO:0030141 secretory granule; GO:0031410 cytoplasmic vesicle; GO:0031974 membrane-enclosed lumen; GO:0031982 vesic…	GO:0003824 catalytic activity; GO:0004553 hydrolase activity, hydrolyzing O-glycosyl compounds; GO:0004566 beta-glucuronidase activity; GO:0005102 receptor binding; GO:0005488 binding; GO:0005515 protein binding; GO:0016787 hydrolase activity; GO:0016798 hydrolase activity, acting on glycosyl bonds; GO:0019904 protein domain specific binding; GO:0030246 carbohydrate binding;	PF02837; PF00703; PF02836	Glycosyl hydrolases family 2, sugar binding domain; Glycosyl hydrolases family 2; Glycosyl hydrolases family 2, TIM barrel domain
Q53H47	Histone-lysine N-methyltransferase SETMAR OS=Homo sapiens OX=9606 GN=SETMAR PE=1 SV=2	SETMAR	1.445	0.00142268	Up	78.033	2.8	2	2	2	cytoplasm	K11433	SETMAR; [histone H3]-lysine36 N-dimethyltransferase SETMAR [EC:2.1.1.357]	map00310 Lysine degradation; map01100 Metabolic pathways	GO:0000075 cell cycle checkpoint; GO:0000278 mitotic cell cycle; GO:0000726 non-recombinational repair; GO:0000729 DNA double-strand break processing; GO:0000737 DNA catabolic process, endonucleolytic; GO:0006139 nucleobase-containing compound metabolic process; GO:0006259 DNA metabolic process; GO:0006260 DNA replication; GO:0006261 DNA-dependent DNA replication; GO:0006281 DNA repair; GO:000628…	GO:0005622 intracellular; GO:0005623 cell; GO:0005634 nucleus; GO:0005694 chromosome; GO:0005730 nucleolus; GO:0031974 membrane-enclosed lumen; GO:0031981 nuclear lumen; GO:0035861 site of double-strand break; GO:0043226 organelle; GO:0043227 membrane-bounded organelle; GO:0043228 non-membrane-bounded organelle; GO:0043229 intracellular organelle; GO:0043231 intracellular membrane-bounded organel…	GO:0000014 single-stranded DNA endodeoxyribonuclease activity; GO:0003676 nucleic acid binding; GO:0003677 DNA binding; GO:0003690 double-stranded DNA binding; GO:0003697 single-stranded DNA binding; GO:0003824 catalytic activity; GO:0004518 nuclease activity; GO:0004519 endonuclease activity; GO:0004520 endodeoxyribonuclease activity; GO:0004536 deoxyribonuclease activity; GO:0005488 binding; GO…
Q8TB24	Ras and Rab interactor 3 OS=Homo sapiens OX=9606 GN=RIN3 PE=1 SV=4	RIN3	1.319	0.0282916	Up	107.85	1.5	1	1	1	nucleus	K23687	RIN2_3; Ras and Rab interactor 2/3		GO:0006810 transport; GO:0006897 endocytosis; GO:0016192 vesicle-mediated transport; GO:0051179 localization; GO:0051234 establishment of localization; GO:0065007 biological regulation; GO:0065009 regulation of molecular function; GO:0098657 import into cell;	GO:0005622 intracellular; GO:0005623 cell; GO:0005737 cytoplasm; GO:0005768 endosome; GO:0005769 early endosome; GO:0005829 cytosol; GO:0012505 endomembrane system; GO:0031410 cytoplasmic vesicle; GO:0031982 vesicle; GO:0043226 organelle; GO:0043227 membrane-bounded organelle; GO:0043229 intracellular organelle; GO:0044424 intracellular part; GO:0044444 cytoplasmic part; GO:0044464 cell part; GO:…	GO:0005085 guanyl-nucleotide exchange factor activity; GO:0005088 Ras guanyl-nucleotide exchange factor activity; GO:0005488 binding; GO:0005515 protein binding; GO:0017016 Ras GTPase binding; GO:0017112 Rab guanyl-nucleotide exchange factor activity; GO:0017137 Rab GTPase binding; GO:0019899 enzyme binding; GO:0031267 small GTPase binding; GO:0051020 GTPase binding; GO:0098772 molecular function…
Q9BT17	Mitochondrial ribosome-associated GTPase 1 OS=Homo sapiens OX=9606 GN=MTG1 PE=1 SV=2	MTG1	0.702	0.00790192	Down	37.236	3.6	1	1	1	mitochondria	K19828	MTG1; mitochondrial GTPase 1		GO:0006417 regulation of translation; GO:0009889 regulation of biosynthetic process; GO:0010468 regulation of gene expression; GO:0010556 regulation of macromolecule biosynthetic process; GO:0010608 posttranscriptional regulation of gene expression; GO:0019222 regulation of metabolic process; GO:0022613 ribonucleoprotein complex biogenesis; GO:0031323 regulation of cellular metabolic process; GO:…	GO:0000313 organellar ribosome; GO:0005622 intracellular; GO:0005623 cell; GO:0005737 cytoplasm; GO:0005739 mitochondrion; GO:0005740 mitochondrial envelope; GO:0005743 mitochondrial inner membrane; GO:0005759 mitochondrial matrix; GO:0005761 mitochondrial ribosome; GO:0005840 ribosome; GO:0016020 membrane; GO:0019866 organelle inner membrane; GO:0031090 organelle membrane; GO:0031966 mitochondri…	GO:0003824 catalytic activity; GO:0003924 GTPase activity; GO:0016462 pyrophosphatase activity; GO:0016787 hydrolase activity; GO:0016817 hydrolase activity, acting on acid anhydrides; GO:0016818 hydrolase activity, acting on acid anhydrides, in phosphorus-containing anhydrides; GO:0017111 nucleoside-triphosphatase activity;
P01742	Immunoglobulin heavy variable 1-69 OS=Homo sapiens OX=9606 GN=IGHV1-69 PE=1 SV=2	IGHV1-69	2.014	0.0194515	Up	12.659	26.5	3	2	3	extracellular	K06856	IGH; immunoglobulin heavy chain	map04020 Calcium signaling pathway; map04064 NF-kappa B signaling pathway; map04072 Phospholipase D signaling pathway; map04145 Phagosome; map04151 PI3K-Akt signaling pathway; map04640 Hematopoietic cell lineage; map04650 Natural killer cell mediated cytotoxicity; map04662 B cell receptor signaling pathway; map04664 Fc epsilon RI signaling pathway; map04666 Fc gamma R-mediated phagocytosis; map04…				PF07686	Immunoglobulin V-set domain
A0A0J9YXX1	Immunoglobulin heavy variable 5-10-1 OS=Homo sapiens OX=9606 GN=IGHV5-10-1 PE=3 SV=1	IGHV5-10-1	2.029	0.0161789	Up	12.772	26.5	3	1	7	extracellular	K06856	IGH; immunoglobulin heavy chain	map04020 Calcium signaling pathway; map04064 NF-kappa B signaling pathway; map04072 Phospholipase D signaling pathway; map04145 Phagosome; map04151 PI3K-Akt signaling pathway; map04640 Hematopoietic cell lineage; map04650 Natural killer cell mediated cytotoxicity; map04662 B cell receptor signaling pathway; map04664 Fc epsilon RI signaling pathway; map04666 Fc gamma R-mediated phagocytosis; map04…				PF07686	Immunoglobulin V-set domain
P06312	Immunoglobulin kappa variable 4-1 OS=Homo sapiens OX=9606 GN=IGKV4-1 PE=1 SV=1	IGKV4-1	1.843	0.0411918	Up	13.38	22.3	3	3	7	extracellular							PF07686	Immunoglobulin V-set domain
O94776	Metastasis-associated protein MTA2 OS=Homo sapiens OX=9606 GN=MTA2 PE=1 SV=1	MTA2	0.736	0.0235076	Down	75.022	20.8	14	12	16	cytoplasm	K11660	MTA; metastasis-associated protein MTA		GO:0000122 negative regulation of transcription from RNA polymerase II promoter; GO:0006139 nucleobase-containing compound metabolic process; GO:0006259 DNA metabolic process; GO:0006304 DNA modification; GO:0006305 DNA alkylation; GO:0006306 DNA methylation; GO:0006323 DNA packaging; GO:0006325 chromatin organization; GO:0006333 chromatin assembly or disassembly; GO:0006338 chromatin remodeling;…	GO:0000118 histone deacetylase complex; GO:0000228 nuclear chromosome; GO:0000785 chromatin; GO:0000790 nuclear chromatin; GO:0005622 intracellular; GO:0005623 cell; GO:0005634 nucleus; GO:0005654 nucleoplasm; GO:0005667 transcription factor complex; GO:0005694 chromosome; GO:0016581 NuRD complex; GO:0017053 transcriptional repressor complex; GO:0031974 membrane-enclosed lumen; GO:0031981 nuclear…	GO:0000981 RNA polymerase II transcription factor activity, sequence-specific DNA binding; GO:0000988 transcription factor activity, protein binding; GO:0000989 transcription factor activity, transcription factor binding; GO:0001067 regulatory region nucleic acid binding; GO:0001085 RNA polymerase II transcription factor binding; GO:0001103 RNA polymerase II repressing transcription factor bindin…	PF01426; PF00320	BAH domain; GATA zinc finger
Q96DH6	RNA-binding protein Musashi homolog 2 OS=Homo sapiens OX=9606 GN=MSI2 PE=1 SV=1	MSI2	0.755	0.00717874	Down	35.196	8.2	2	2	2	nucleus	K14411	MSI; RNA-binding protein Musashi	map03015 mRNA surveillance pathway	GO:0009987 cellular process; GO:0030154 cell differentiation; GO:0032502 developmental process; GO:0048468 cell development; GO:0048856 anatomical structure development; GO:0048863 stem cell differentiation; GO:0048864 stem cell development; GO:0048869 cellular developmental process;	GO:0005622 intracellular; GO:0005623 cell; GO:0005737 cytoplasm; GO:0005844 polysome; GO:0032991 macromolecular complex; GO:0044424 intracellular part; GO:0044464 cell part; GO:1990904 ribonucleoprotein complex;	GO:0003676 nucleic acid binding; GO:0003723 RNA binding; GO:0003727 single-stranded RNA binding; GO:0005488 binding; GO:0008187 poly-pyrimidine tract binding; GO:0008266 poly(U) RNA binding; GO:0097159 organic cyclic compound binding; GO:1901363 heterocyclic compound binding;	PF00076	RNA recognition motif. (a.k.a. RRM, RBD, or RNP domain)
Q8N130	Sodium-dependent phosphate transport protein 2C OS=Homo sapiens OX=9606 GN=SLC34A3 PE=1 SV=2	SLC34A3	1.819	0.00120985	Up	63.549	1.3	1	1	1	plasma membrane	K14683	SLC34A, NPT, nptA; solute carrier family 34 (sodium-dependent phosphate cotransporter)	map04928 Parathyroid hormone synthesis, secretion and action; map04978 Mineral absorption	GO:0006810 transport; GO:0006811 ion transport; GO:0006812 cation transport; GO:0006814 sodium ion transport; GO:0006817 phosphate ion transport; GO:0006820 anion transport; GO:0006873 cellular ion homeostasis; GO:0009605 response to external stimulus; GO:0009987 cellular process; GO:0009991 response to extracellular stimulus; GO:0010035 response to inorganic substance; GO:0010038 response to met…	GO:0005622 intracellular; GO:0005623 cell; GO:0005737 cytoplasm; GO:0005886 plasma membrane; GO:0005903 brush border; GO:0016020 membrane; GO:0016324 apical plasma membrane; GO:0031253 cell projection membrane; GO:0031410 cytoplasmic vesicle; GO:0031526 brush border membrane; GO:0031982 vesicle; GO:0042995 cell projection; GO:0043226 organelle; GO:0043227 membrane-bounded organelle; GO:0043229 in…	GO:0005215 transporter activity; GO:0005436 sodium:phosphate symporter activity; GO:0008324 cation transmembrane transporter activity; GO:0008509 anion transmembrane transporter activity; GO:0015075 ion transmembrane transporter activity; GO:0015077 monovalent inorganic cation transmembrane transporter activity; GO:0015081 sodium ion transmembrane transporter activity; GO:0015103 inorganic anion …
P01709	Immunoglobulin lambda variable 2-8 OS=Homo sapiens OX=9606 GN=IGLV2-8 PE=1 SV=2	IGLV2-8	2.647	0.0474489	Up	12.382	13.6	2	1	3	extracellular							PF07686	Immunoglobulin V-set domain
P29966	Myristoylated alanine-rich C-kinase substrate OS=Homo sapiens OX=9606 GN=MARCKS PE=1 SV=4	MARCKS	1.462	0.0212181	Up	31.554	19.3	4	4	7	nucleus	K12561	MARCKS; myristoylated alanine-rich C-kinase substrate	map04666 Fc gamma R-mediated phagocytosis; map05206 MicroRNAs in cancer	GO:0001932 regulation of protein phosphorylation; GO:0001934 positive regulation of protein phosphorylation; GO:0003229 ventricular cardiac muscle tissue development; GO:0006810 transport; GO:0006886 intracellular protein transport; GO:0006996 organelle organization; GO:0007010 cytoskeleton organization; GO:0007015 actin filament organization; GO:0007155 cell adhesion; GO:0007275 multicellular or…	GO:0000323 lytic vacuole; GO:0001520 outer dense fiber; GO:0001674 female germ cell nucleus; GO:0005622 intracellular; GO:0005623 cell; GO:0005634 nucleus; GO:0005737 cytoplasm; GO:0005764 lysosome; GO:0005773 vacuole; GO:0005813 centrosome; GO:0005815 microtubule organizing center; GO:0005829 cytosol; GO:0005856 cytoskeleton; GO:0005886 plasma membrane; GO:0005929 cilium; GO:0005938 cell cortex;…	GO:0001786 phosphatidylserine binding; GO:0003779 actin binding; GO:0005080 protein kinase C binding; GO:0005488 binding; GO:0005515 protein binding; GO:0005516 calmodulin binding; GO:0005543 phospholipid binding; GO:0008092 cytoskeletal protein binding; GO:0008289 lipid binding; GO:0019899 enzyme binding; GO:0019900 kinase binding; GO:0019901 protein kinase binding; GO:0042802 identical protein …
Q92743	Serine protease HTRA1 OS=Homo sapiens OX=9606 GN=HTRA1 PE=1 SV=1	HTRA1	1.507	0.0382792	Up	51.286	9.8	5	5	5	extracellular	K08784	HTRA1, PRSS11; HtrA serine peptidase 1 [EC:3.4.21.-]		GO:0000003 reproduction; GO:0001890 placenta development; GO:0002682 regulation of immune system process; GO:0002683 negative regulation of immune system process; GO:0002697 regulation of immune effector process; GO:0002698 negative regulation of immune effector process; GO:0002831 regulation of response to biotic stimulus; GO:0002832 negative regulation of response to biotic stimulus; GO:0003006…	GO:0005576 extracellular region; GO:0005615 extracellular space; GO:0005623 cell; GO:0005886 plasma membrane; GO:0016020 membrane; GO:0031012 extracellular matrix; GO:0044421 extracellular region part; GO:0044464 cell part; GO:0071944 cell periphery;	GO:0003824 catalytic activity; GO:0004175 endopeptidase activity; GO:0004252 serine-type endopeptidase activity; GO:0005488 binding; GO:0005515 protein binding; GO:0008233 peptidase activity; GO:0008236 serine-type peptidase activity; GO:0016787 hydrolase activity; GO:0017171 serine hydrolase activity; GO:0042802 identical protein binding; GO:0070011 peptidase activity, acting on L-amino acid pep…	PF00219; PF07648; PF13365	Insulin-like growth factor binding protein; Kazal-type serine protease inhibitor domain; Trypsin-like peptidase domain
Q93062	RNA-binding protein with multiple splicing OS=Homo sapiens OX=9606 GN=RBPMS PE=1 SV=1	RBPMS	0.74	0.0230312	Down	21.802	9.2	2	2	3	cytoplasm							PF00076	RNA recognition motif. (a.k.a. RRM, RBD, or RNP domain)
Q9H488	GDP-fucose protein O-fucosyltransferase 1 OS=Homo sapiens OX=9606 GN=POFUT1 PE=1 SV=1	POFUT1	0.744	0.0232678	Down	43.955	6.4	2	2	2	extracellular	K03691	POFUT; peptide-O-fucosyltransferase [EC:2.4.1.221]	map00514 Other types of O-glycan biosynthesis	GO:0001525 angiogenesis; GO:0001568 blood vessel development; GO:0001756 somitogenesis; GO:0001944 vasculature development; GO:0003002 regionalization; GO:0005975 carbohydrate metabolic process; GO:0005996 monosaccharide metabolic process; GO:0006004 fucose metabolic process; GO:0006355 regulation of transcription, DNA-templated; GO:0006464 cellular protein modification process; GO:0006486 protei…	GO:0005622 intracellular; GO:0005623 cell; GO:0005737 cytoplasm; GO:0005783 endoplasmic reticulum; GO:0005789 endoplasmic reticulum membrane; GO:0012505 endomembrane system; GO:0016020 membrane; GO:0031984 organelle subcompartment; GO:0042175 nuclear outer membrane-endoplasmic reticulum membrane network; GO:0043226 organelle; GO:0043227 membrane-bounded organelle; GO:0043229 intracellular organel…	GO:0003824 catalytic activity; GO:0008417 fucosyltransferase activity; GO:0016740 transferase activity; GO:0016757 transferase activity, transferring glycosyl groups; GO:0016758 transferase activity, transferring hexosyl groups; GO:0046922 peptide-O-fucosyltransferase activity;
Q15113	Procollagen C-endopeptidase enhancer 1 OS=Homo sapiens OX=9606 GN=PCOLCE PE=1 SV=2	PCOLCE	1.714	0.0149838	Up	47.972	36.5	13	13	19	nucleus				GO:0006508 proteolysis; GO:0006807 nitrogen compound metabolic process; GO:0007275 multicellular organism development; GO:0008152 metabolic process; GO:0009893 positive regulation of metabolic process; GO:0009987 cellular process; GO:0010033 response to organic substance; GO:0010604 positive regulation of macromolecule metabolic process; GO:0010952 positive regulation of peptidase activity; GO:00…	GO:0005576 extracellular region;	GO:0005488 binding; GO:0005518 collagen binding; GO:0005539 glycosaminoglycan binding; GO:0008047 enzyme activator activity; GO:0008201 heparin binding; GO:0016504 peptidase activator activity; GO:0030234 enzyme regulator activity; GO:0043167 ion binding; GO:0043168 anion binding; GO:0044877 macromolecular complex binding; GO:0061134 peptidase regulator activity; GO:0097367 carbohydrate derivativ…	PF00431; PF01759	CUB domain; UNC-6/NTR/C345C module
Q99959	Plakophilin-2 OS=Homo sapiens OX=9606 GN=PKP2 PE=1 SV=2	PKP2	0.766	0.0323974	Down	97.414	12	10	10	10	nucleus	K12642	PKP2; plakophilin 2	map05412 Arrhythmogenic right ventricular cardiomyopathy (ARVC)	GO:0001508 action potential; GO:0002027 regulation of heart rate; GO:0002028 regulation of sodium ion transport; GO:0002159 desmosome assembly; GO:0002934 desmosome organization; GO:0003007 heart morphogenesis; GO:0003008 system process; GO:0003012 muscle system process; GO:0003013 circulatory system process; GO:0003015 heart process; GO:0003205 cardiac chamber development; GO:0003206 cardiac cha…	GO:0001533 cornified envelope; GO:0005622 intracellular; GO:0005623 cell; GO:0005634 nucleus; GO:0005654 nucleoplasm; GO:0005856 cytoskeleton; GO:0005882 intermediate filament; GO:0005886 plasma membrane; GO:0005911 cell-cell junction; GO:0005912 adherens junction; GO:0014704 intercalated disc; GO:0016020 membrane; GO:0016021 integral component of membrane; GO:0030054 cell junction; GO:0030057 de…	GO:0005080 protein kinase C binding; GO:0005198 structural molecule activity; GO:0005488 binding; GO:0005515 protein binding; GO:0016247 channel regulator activity; GO:0017080 sodium channel regulator activity; GO:0019215 intermediate filament binding; GO:0019899 enzyme binding; GO:0019900 kinase binding; GO:0019901 protein kinase binding; GO:0032947 protein complex scaffold; GO:0044325 ion chann…
Q99969	Retinoic acid receptor responder protein 2 OS=Homo sapiens OX=9606 GN=RARRES2 PE=1 SV=1	RARRES2	1.58	0.012169	Up	18.617	14.1	2	2	2	extracellular	K10044	RARRES2; retinoic acid receptor responder protein 2		GO:0001523 retinoid metabolic process; GO:0001701 in utero embryonic development; GO:0001932 regulation of protein phosphorylation; GO:0001934 positive regulation of protein phosphorylation; GO:0002376 immune system process; GO:0002576 platelet degranulation; GO:0002682 regulation of immune system process; GO:0002684 positive regulation of immune system process; GO:0002685 regulation of leukocyte…	GO:0005576 extracellular region; GO:0005615 extracellular space; GO:0005622 intracellular; GO:0005623 cell; GO:0005737 cytoplasm; GO:0012505 endomembrane system; GO:0030141 secretory granule; GO:0031012 extracellular matrix; GO:0031089 platelet dense granule lumen; GO:0031410 cytoplasmic vesicle; GO:0031974 membrane-enclosed lumen; GO:0031982 vesicle; GO:0031983 vesicle lumen; GO:0034774 secretor…	GO:0005102 receptor binding; GO:0005488 binding; GO:0005515 protein binding;
Q92626	Peroxidasin homolog OS=Homo sapiens OX=9606 GN=PXDN PE=1 SV=2	PXDN	1.453	0.0236268	Up	165.27	14.2	18	18	23	extracellular	K19511	PXDN, VPO1; peroxidase [EC:1.11.1.7]		GO:0001959 regulation of cytokine-mediated signaling pathway; GO:0001960 negative regulation of cytokine-mediated signaling pathway; GO:0002376 immune system process; GO:0006955 immune response; GO:0008152 metabolic process; GO:0009056 catabolic process; GO:0009636 response to toxic substance; GO:0009966 regulation of signal transduction; GO:0009968 negative regulation of signal transduction; GO:…	GO:0005576 extracellular region; GO:0005615 extracellular space; GO:0005622 intracellular; GO:0005623 cell; GO:0005737 cytoplasm; GO:0005783 endoplasmic reticulum; GO:0012505 endomembrane system; GO:0031012 extracellular matrix; GO:0043226 organelle; GO:0043227 membrane-bounded organelle; GO:0043229 intracellular organelle; GO:0043231 intracellular membrane-bounded organelle; GO:0044421 extracell…	GO:0003824 catalytic activity; GO:0004601 peroxidase activity; GO:0005102 receptor binding; GO:0005126 cytokine receptor binding; GO:0005152 interleukin-1 receptor antagonist activity; GO:0005198 structural molecule activity; GO:0005201 extracellular matrix structural constituent; GO:0005488 binding; GO:0005515 protein binding; GO:0016209 antioxidant activity; GO:0016491 oxidoreductase activity; …	PF07679; PF03098	Immunoglobulin I-set domain; Animal haem peroxidase
P98179	RNA-binding protein 3 OS=Homo sapiens OX=9606 GN=RBM3 PE=1 SV=1	RBM3	1.554	0.00563604	Up	17.17	15.9	2	2	2	nucleus	K13186	RBM3; RNA-binding protein 3		GO:0006139 nucleobase-containing compound metabolic process; GO:0006396 RNA processing; GO:0006412 translation; GO:0006417 regulation of translation; GO:0006518 peptide metabolic process; GO:0006725 cellular aromatic compound metabolic process; GO:0006807 nitrogen compound metabolic process; GO:0006950 response to stress; GO:0008152 metabolic process; GO:0009058 biosynthetic process; GO:0009059 m…	GO:0005622 intracellular; GO:0005623 cell; GO:0005634 nucleus; GO:0005654 nucleoplasm; GO:0005730 nucleolus; GO:0005737 cytoplasm; GO:0030425 dendrite; GO:0031974 membrane-enclosed lumen; GO:0031981 nuclear lumen; GO:0036477 somatodendritic compartment; GO:0042995 cell projection; GO:0043005 neuron projection; GO:0043226 organelle; GO:0043227 membrane-bounded organelle; GO:0043228 non-membrane-bo…	GO:0005488 binding; GO:0043021 ribonucleoprotein complex binding; GO:0043023 ribosomal large subunit binding; GO:0044877 macromolecular complex binding;	PF00076	RNA recognition motif. (a.k.a. RRM, RBD, or RNP domain)
O95104	SR-related and CTD-associated factor 4 OS=Homo sapiens OX=9606 GN=SCAF4 PE=1 SV=3	SCAF4	0.757	0.0318935	Down	125.87	3.9	4	4	4	nucleus	K13167	SFRS15, SCAF4; splicing factor, arginine/serine-rich 15		GO:0006139 nucleobase-containing compound metabolic process; GO:0006396 RNA processing; GO:0006397 mRNA processing; GO:0006725 cellular aromatic compound metabolic process; GO:0006807 nitrogen compound metabolic process; GO:0008152 metabolic process; GO:0009987 cellular process; GO:0010467 gene expression; GO:0016070 RNA metabolic process; GO:0016071 mRNA metabolic process; GO:0034641 cellular ni…	GO:0005622 intracellular; GO:0005623 cell; GO:0005634 nucleus; GO:0005654 nucleoplasm; GO:0031974 membrane-enclosed lumen; GO:0031981 nuclear lumen; GO:0043226 organelle; GO:0043227 membrane-bounded organelle; GO:0043229 intracellular organelle; GO:0043231 intracellular membrane-bounded organelle; GO:0043233 organelle lumen; GO:0044422 organelle part; GO:0044424 intracellular part; GO:0044428 nuc…	GO:0005488 binding; GO:0005515 protein binding; GO:0008022 protein C-terminus binding;	PF00076	RNA recognition motif. (a.k.a. RRM, RBD, or RNP domain)
Q6UX53	Methyltransferase-like protein 7B OS=Homo sapiens OX=9606 GN=METTL7B PE=1 SV=2	METTL7B	0.579	0.0292946	Down	27.775	9.8	2	2	2	extracellular							PF08241	Methyltransferase domain
Q99983	Osteomodulin OS=Homo sapiens OX=9606 GN=OMD PE=1 SV=1	OMD	2.291	0.0446801	Up	49.492	6.2	3	3	5	plasma membrane	K08124	OMD; osteomodulin		GO:0006022 aminoglycan metabolic process; GO:0006023 aminoglycan biosynthetic process; GO:0006024 glycosaminoglycan biosynthetic process; GO:0006026 aminoglycan catabolic process; GO:0006027 glycosaminoglycan catabolic process; GO:0006082 organic acid metabolic process; GO:0006790 sulfur compound metabolic process; GO:0006807 nitrogen compound metabolic process; GO:0008152 metabolic process; GO:0…	GO:0000323 lytic vacuole; GO:0005576 extracellular region; GO:0005615 extracellular space; GO:0005622 intracellular; GO:0005623 cell; GO:0005737 cytoplasm; GO:0005764 lysosome; GO:0005773 vacuole; GO:0005775 vacuolar lumen; GO:0005794 Golgi apparatus; GO:0005796 Golgi lumen; GO:0012505 endomembrane system; GO:0031974 membrane-enclosed lumen; GO:0043202 lysosomal lumen; GO:0043226 organelle; GO:00…
Q96P16	Regulation of nuclear pre-mRNA domain-containing protein 1A OS=Homo sapiens OX=9606 GN=RPRD1A PE=1 SV=1	RPRD1A	0.66	0.0256331	Down	35.719	5.8	2	2	3	nucleus				GO:0006139 nucleobase-containing compound metabolic process; GO:0006351 transcription, DNA-templated; GO:0006355 regulation of transcription, DNA-templated; GO:0006357 regulation of transcription from RNA polymerase II promoter; GO:0006366 transcription from RNA polymerase II promoter; GO:0006464 cellular protein modification process; GO:0006470 protein dephosphorylation; GO:0006725 cellular arom…	GO:0000428 DNA-directed RNA polymerase complex; GO:0005622 intracellular; GO:0005623 cell; GO:0005634 nucleus; GO:0005654 nucleoplasm; GO:0016591 DNA-directed RNA polymerase II, holoenzyme; GO:0030880 RNA polymerase complex; GO:0031974 membrane-enclosed lumen; GO:0031981 nuclear lumen; GO:0032991 macromolecular complex; GO:0043226 organelle; GO:0043227 membrane-bounded organelle; GO:0043229 intra…	GO:0005488 binding; GO:0005515 protein binding; GO:0042802 identical protein binding;
P07602	Prosaposin OS=Homo sapiens OX=9606 GN=PSAP PE=1 SV=2	PSAP	0.728	0.029669	Down	58.112	12	7	7	8	plasma membrane	K12382	PSAP, SGP1; saposin	map04142 Lysosome	GO:0000003 reproduction; GO:0001655 urogenital system development; GO:0001775 cell activation; GO:0001932 regulation of protein phosphorylation; GO:0001934 positive regulation of protein phosphorylation; GO:0002252 immune effector process; GO:0002263 cell activation involved in immune response; GO:0002274 myeloid leukocyte activation; GO:0002275 myeloid cell activation involved in immune response…	GO:0000323 lytic vacuole; GO:0005576 extracellular region; GO:0005615 extracellular space; GO:0005622 intracellular; GO:0005623 cell; GO:0005737 cytoplasm; GO:0005764 lysosome; GO:0005765 lysosomal membrane; GO:0005766 primary lysosome; GO:0005773 vacuole; GO:0005774 vacuolar membrane; GO:0005775 vacuolar lumen; GO:0005886 plasma membrane; GO:0012505 endomembrane system; GO:0012506 vesicle membra…	GO:0001664 G-protein coupled receptor binding; GO:0003824 catalytic activity; GO:0004553 hydrolase activity, hydrolyzing O-glycosyl compounds; GO:0004565 beta-galactosidase activity; GO:0005102 receptor binding; GO:0005488 binding; GO:0005515 protein binding; GO:0005543 phospholipid binding; GO:0008047 enzyme activator activity; GO:0008289 lipid binding; GO:0015925 galactosidase activity; GO:0016…	PF05184	Saposin-like type B, region 1
Q9NR99	Matrix-remodeling-associated protein 5 OS=Homo sapiens OX=9606 GN=MXRA5 PE=1 SV=3	MXRA5	1.459	0.00958374	Up	312.15	15.5	36	36	41	extracellular				GO:0009719 response to endogenous stimulus; GO:0010033 response to organic substance; GO:0042221 response to chemical; GO:0050896 response to stimulus; GO:0070848 response to growth factor; GO:0071559 response to transforming growth factor beta;			PF13927; PF07679	Immunoglobulin domain; Immunoglobulin I-set domain
P12107	Collagen alpha-1(XI) chain OS=Homo sapiens OX=9606 GN=COL11A1 PE=1 SV=4	COL11A1	1.899	0.00289463	Up	181.06	4.8	9	8	11	mitochondria	K19721	COL5AS; collagen, type V/XI/XXIV/XXVII, alpha	map04974 Protein digestion and absorption	GO:0001501 skeletal system development; GO:0001502 cartilage condensation; GO:0001503 ossification; GO:0001704 formation of primary germ layer; GO:0001706 endoderm formation; GO:0002062 chondrocyte differentiation; GO:0002063 chondrocyte development; GO:0003007 heart morphogenesis; GO:0003008 system process; GO:0003205 cardiac chamber development; GO:0003206 cardiac chamber morphogenesis; GO:0003…	GO:0005576 extracellular region; GO:0005581 collagen trimer; GO:0005583 fibrillar collagen trimer; GO:0005592 collagen type XI trimer; GO:0005622 intracellular; GO:0005623 cell; GO:0005737 cytoplasm; GO:0005783 endoplasmic reticulum; GO:0005788 endoplasmic reticulum lumen; GO:0012505 endomembrane system; GO:0031012 extracellular matrix; GO:0031974 membrane-enclosed lumen; GO:0032991 macromolecula…	GO:0005198 structural molecule activity; GO:0005201 extracellular matrix structural constituent; GO:0005488 binding; GO:0005515 protein binding; GO:0005539 glycosaminoglycan binding; GO:0008201 heparin binding; GO:0030674 protein binding, bridging; GO:0043167 ion binding; GO:0043168 anion binding; GO:0050840 extracellular matrix binding; GO:0060090 binding, bridging; GO:0097367 carbohydrate deriv…	PF02210	Laminin G domain
P01703	Immunoglobulin lambda variable 1-40 OS=Homo sapiens OX=9606 GN=IGLV1-40 PE=1 SV=2	IGLV1-40	1.609	0.0280312	Up	12.301	13.6	1	1	3	extracellular							PF07686	Immunoglobulin V-set domain
A0A0C4DH34	Immunoglobulin heavy variable 4-28 OS=Homo sapiens OX=9606 GN=IGHV4-28 PE=3 SV=1	IGHV4-28	1.729	0.0175721	Up	13.124	7.7	1	1	2	extracellular	K06856	IGH; immunoglobulin heavy chain	map04020 Calcium signaling pathway; map04064 NF-kappa B signaling pathway; map04072 Phospholipase D signaling pathway; map04145 Phagosome; map04151 PI3K-Akt signaling pathway; map04640 Hematopoietic cell lineage; map04650 Natural killer cell mediated cytotoxicity; map04662 B cell receptor signaling pathway; map04664 Fc epsilon RI signaling pathway; map04666 Fc gamma R-mediated phagocytosis; map04…				PF07686	Immunoglobulin V-set domain
P0DOX4	Immunoglobulin epsilon heavy chain OS=Homo sapiens OX=9606 PE=1 SV=1	--	1.64	0.0464275	Up	60.322	3.5	2	2	2	nucleus	K06856	IGH; immunoglobulin heavy chain	map04020 Calcium signaling pathway; map04064 NF-kappa B signaling pathway; map04072 Phospholipase D signaling pathway; map04145 Phagosome; map04151 PI3K-Akt signaling pathway; map04640 Hematopoietic cell lineage; map04650 Natural killer cell mediated cytotoxicity; map04662 B cell receptor signaling pathway; map04664 Fc epsilon RI signaling pathway; map04666 Fc gamma R-mediated phagocytosis; map04…	GO:0002250 adaptive immune response; GO:0002252 immune effector process; GO:0002253 activation of immune response; GO:0002376 immune system process; GO:0002429 immune response-activating cell surface receptor signaling pathway; GO:0002443 leukocyte mediated immunity; GO:0002449 lymphocyte mediated immunity; GO:0002455 humoral immune response mediated by circulating immunoglobulin; GO:0002460 adap…	GO:0005576 extracellular region; GO:0005615 extracellular space; GO:0005623 cell; GO:0005886 plasma membrane; GO:0009897 external side of plasma membrane; GO:0009986 cell surface; GO:0016020 membrane; GO:0019814 immunoglobulin complex; GO:0032991 macromolecular complex; GO:0042571 immunoglobulin complex, circulating; GO:0044421 extracellular region part; GO:0044425 membrane part; GO:0044459 plasm…	GO:0003823 antigen binding; GO:0005102 receptor binding; GO:0005488 binding; GO:0005515 protein binding; GO:0034987 immunoglobulin receptor binding;	PF07686; PF07654	Immunoglobulin V-set domain; Immunoglobulin C1-set domain
P01701	Immunoglobulin lambda variable 1-51 OS=Homo sapiens OX=9606 GN=IGLV1-51 PE=1 SV=2	IGLV1-51	1.597	0.0474738	Up	12.249	13.7	3	3	10	extracellular							PF07686	Immunoglobulin V-set domain
P01721	Immunoglobulin lambda variable 6-57 OS=Homo sapiens OX=9606 GN=IGLV6-57 PE=1 SV=2	IGLV6-57	3.191	0.0327848	Up	12.566	18.8	1	1	1	extracellular	K06553	VPREB, CD179a; pre-B lymphocyte gene					PF07686	Immunoglobulin V-set domain
O60760	Hematopoietic prostaglandin D synthase OS=Homo sapiens OX=9606 GN=HPGDS PE=1 SV=3	HPGDS	0.721	0.0202714	Down	23.344	5	1	1	2	cytoplasm	K04097	HPGDS; prostaglandin-H2 D-isomerase / glutathione transferase [EC:5.3.99.2 2.5.1.18]	map00480 Glutathione metabolism; map00590 Arachidonic acid metabolism; map00980 Metabolism of xenobiotics by cytochrome P450; map00982 Drug metabolism - cytochrome P450; map01100 Metabolic pathways; map05204 Chemical carcinogenesis	GO:0001516 prostaglandin biosynthetic process; GO:0001676 long-chain fatty acid metabolic process; GO:0006082 organic acid metabolic process; GO:0006629 lipid metabolic process; GO:0006631 fatty acid metabolic process; GO:0006633 fatty acid biosynthetic process; GO:0006636 unsaturated fatty acid biosynthetic process; GO:0006690 icosanoid metabolic process; GO:0006692 prostanoid metabolic process;…	GO:0005622 intracellular; GO:0005623 cell; GO:0005737 cytoplasm; GO:0005829 cytosol; GO:0044424 intracellular part; GO:0044444 cytoplasmic part; GO:0044464 cell part;	GO:0000287 magnesium ion binding; GO:0003824 catalytic activity; GO:0004364 glutathione transferase activity; GO:0004667 prostaglandin-D synthase activity; GO:0005488 binding; GO:0005509 calcium ion binding; GO:0005515 protein binding; GO:0016740 transferase activity; GO:0016765 transferase activity, transferring alkyl or aryl (other than methyl) groups; GO:0016853 isomerase activity; GO:0016860 …	PF02798	Glutathione S-transferase, N-terminal domain
P14209	CD99 antigen OS=Homo sapiens OX=9606 GN=CD99 PE=1 SV=1	CD99	1.872	0.00719159	Up	18.848	5.4	1	1	1	extracellular	K06520	CD99, MIC2; CD99 antigen	map04514 Cell adhesion molecules (CAMs); map04670 Leukocyte transendothelial migration	GO:0002682 regulation of immune system process; GO:0048583 regulation of response to stimulus; GO:0050776 regulation of immune response; GO:0050789 regulation of biological process; GO:0065007 biological regulation;	GO:0005622 intracellular; GO:0005623 cell; GO:0005737 cytoplasm; GO:0005886 plasma membrane; GO:0005887 integral component of plasma membrane; GO:0016020 membrane; GO:0016021 integral component of membrane; GO:0031224 intrinsic component of membrane; GO:0031226 intrinsic component of plasma membrane; GO:0044424 intracellular part; GO:0044425 membrane part; GO:0044459 plasma membrane part; GO:0044…
Q14643	Inositol 1,4,5-trisphosphate receptor type 1 OS=Homo sapiens OX=9606 GN=ITPR1 PE=1 SV=3	ITPR1	0.756	0.0186892	Down	313.93	4.9	15	7	15	plasma membrane	K04958	ITPR1; inositol 1,4,5-triphosphate receptor type 1	map04020 Calcium signaling pathway; map04022 cGMP-PKG signaling pathway; map04070 Phosphatidylinositol signaling system; map04114 Oocyte meiosis; map04140 Autophagy - animal; map04210 Apoptosis; map04218 Cellular senescence; map04270 Vascular smooth muscle contraction; map04371 Apelin signaling pathway; map04540 Gap junction; map04611 Platelet activation; map04621 NOD-like receptor signaling path…	GO:0001666 response to hypoxia; GO:0001775 cell activation; GO:0002791 regulation of peptide secretion; GO:0006810 transport; GO:0006811 ion transport; GO:0006812 cation transport; GO:0006816 calcium ion transport; GO:0006873 cellular ion homeostasis; GO:0006874 cellular calcium ion homeostasis; GO:0006875 cellular metal ion homeostasis; GO:0006915 apoptotic process; GO:0006950 response to stress…	GO:0005622 intracellular; GO:0005623 cell; GO:0005634 nucleus; GO:0005635 nuclear envelope; GO:0005637 nuclear inner membrane; GO:0005730 nucleolus; GO:0005737 cytoplasm; GO:0005783 endoplasmic reticulum; GO:0005789 endoplasmic reticulum membrane; GO:0005886 plasma membrane; GO:0005955 calcineurin complex; GO:0008287 protein serine/threonine phosphatase complex; GO:0012505 endomembrane system; GO…	GO:0005215 transporter activity; GO:0005216 ion channel activity; GO:0005217 intracellular ligand-gated ion channel activity; GO:0005220 inositol 1,4,5-trisphosphate-sensitive calcium-release channel activity; GO:0005246 calcium channel regulator activity; GO:0005261 cation channel activity; GO:0005262 calcium channel activity; GO:0005488 binding; GO:0005509 calcium ion binding; GO:0005515 protei…	PF08709; PF02815	Inositol 1,4,5-trisphosphate/ryanodine receptor; MIR domain
P69892	Hemoglobin subunit gamma-2 OS=Homo sapiens OX=9606 GN=HBG2 PE=1 SV=2	HBG2	2.713	0.0281042	Up	16.126	49	6	4	7	cytoplasm	K13824	HBG; hemoglobin subunit gamma		GO:0006950 response to stress; GO:0007596 blood coagulation; GO:0007599 hemostasis; GO:0009611 response to wounding; GO:0032501 multicellular organismal process; GO:0042060 wound healing; GO:0050817 coagulation; GO:0050878 regulation of body fluid levels; GO:0050896 response to stimulus; GO:0065007 biological regulation; GO:0065008 regulation of biological quality;	GO:0005622 intracellular; GO:0005623 cell; GO:0005737 cytoplasm; GO:0005829 cytosol; GO:0044424 intracellular part; GO:0044444 cytoplasmic part; GO:0044464 cell part;		PF00042	Globin
Q8NE01	Metal transporter CNNM3 OS=Homo sapiens OX=9606 GN=CNNM3 PE=1 SV=1	CNNM3	0.71	0.0335941	Down	76.118	6.4	5	4	5	plasma membrane	K16302	CNNM; metal transporter CNNM					PF00571	CBS domain
Q96SW2	Protein cereblon OS=Homo sapiens OX=9606 GN=CRBN PE=1 SV=1	CRBN	0.667	0.0176516	Down	50.545	2.3	1	1	1	cytoplasm	K11793	CRBN; cereblon		GO:0006464 cellular protein modification process; GO:0006508 proteolysis; GO:0006511 ubiquitin-dependent protein catabolic process; GO:0006807 nitrogen compound metabolic process; GO:0008152 metabolic process; GO:0009056 catabolic process; GO:0009057 macromolecule catabolic process; GO:0009987 cellular process; GO:0010498 proteasomal protein catabolic process; GO:0016567 protein ubiquitination; G…	GO:0000151 ubiquitin ligase complex; GO:0005622 intracellular; GO:0005623 cell; GO:0005634 nucleus; GO:0005730 nucleolus; GO:0005737 cytoplasm; GO:0031461 cullin-RING ubiquitin ligase complex; GO:0031464 Cul4A-RING E3 ubiquitin ligase complex; GO:0031974 membrane-enclosed lumen; GO:0031981 nuclear lumen; GO:0032991 macromolecular complex; GO:0043226 organelle; GO:0043227 membrane-bounded organell…		PF03226	Yippee putative zinc-binding protein
Q9Y4H4	G-protein-signaling modulator 3 OS=Homo sapiens OX=9606 GN=GPSM3 PE=1 SV=1	GPSM3	1.325	0.0464728	Up	17.866	14.4	1	1	1	cytoplasm	K15838	GPSM3, AGS4; G-protein signaling modulator 3		GO:0001817 regulation of cytokine production; GO:0001819 positive regulation of cytokine production; GO:0002376 immune system process; GO:0002682 regulation of immune system process; GO:0002684 positive regulation of immune system process; GO:0002685 regulation of leukocyte migration; GO:0002687 positive regulation of leukocyte migration; GO:0002688 regulation of leukocyte chemotaxis; GO:0002690 …	GO:0005623 cell; GO:0005886 plasma membrane; GO:0016020 membrane; GO:0044464 cell part; GO:0071944 cell periphery;
Q9BXJ4	Complement C1q tumor necrosis factor-related protein 3 OS=Homo sapiens OX=9606 GN=C1QTNF3 PE=1 SV=1	C1QTNF3	1.615	0.00468437	Up	26.994	6.5	2	2	2	extracellular				GO:0001817 regulation of cytokine production; GO:0001818 negative regulation of cytokine production; GO:0001819 positive regulation of cytokine production; GO:0001932 regulation of protein phosphorylation; GO:0001934 positive regulation of protein phosphorylation; GO:0002791 regulation of peptide secretion; GO:0002792 negative regulation of peptide secretion; GO:0002793 positive regulation of pep…	GO:0005576 extracellular region; GO:0005615 extracellular space; GO:0044421 extracellular region part;	GO:0005488 binding; GO:0005515 protein binding; GO:0042802 identical protein binding;	PF00386	C1q domain
P0DOY3	Immunoglobulin lambda constant 3 OS=Homo sapiens OX=9606 GN=IGLC3 PE=1 SV=1	IGLC3	1.75	0.0341324	Up	11.265	62.3	5	2	36	extracellular	K06554	IGLL1, IGLL, CD179b; immunoglobulin lambda-like polypeptide 1	map05340 Primary immunodeficiency	GO:0002250 adaptive immune response; GO:0002252 immune effector process; GO:0002253 activation of immune response; GO:0002376 immune system process; GO:0002429 immune response-activating cell surface receptor signaling pathway; GO:0002431 Fc receptor mediated stimulatory signaling pathway; GO:0002433 immune response-regulating cell surface receptor signaling pathway involved in phagocytosis; GO:0…	GO:0005576 extracellular region; GO:0005615 extracellular space; GO:0005623 cell; GO:0005886 plasma membrane; GO:0009897 external side of plasma membrane; GO:0009986 cell surface; GO:0016020 membrane; GO:0019814 immunoglobulin complex; GO:0032991 macromolecular complex; GO:0042571 immunoglobulin complex, circulating; GO:0044421 extracellular region part; GO:0044425 membrane part; GO:0044459 plasm…	GO:0003823 antigen binding; GO:0003824 catalytic activity; GO:0004175 endopeptidase activity; GO:0004252 serine-type endopeptidase activity; GO:0005102 receptor binding; GO:0005488 binding; GO:0005515 protein binding; GO:0008233 peptidase activity; GO:0008236 serine-type peptidase activity; GO:0016787 hydrolase activity; GO:0017171 serine hydrolase activity; GO:0034987 immunoglobulin receptor bin…	PF07654	Immunoglobulin C1-set domain
P01743	Immunoglobulin heavy variable 1-46 OS=Homo sapiens OX=9606 GN=IGHV1-46 PE=1 SV=2	IGHV1-46	1.991	0.0224728	Up	12.933	22.2	2	1	3	extracellular	K06856	IGH; immunoglobulin heavy chain	map04020 Calcium signaling pathway; map04064 NF-kappa B signaling pathway; map04072 Phospholipase D signaling pathway; map04145 Phagosome; map04151 PI3K-Akt signaling pathway; map04640 Hematopoietic cell lineage; map04650 Natural killer cell mediated cytotoxicity; map04662 B cell receptor signaling pathway; map04664 Fc epsilon RI signaling pathway; map04666 Fc gamma R-mediated phagocytosis; map04…				PF07686	Immunoglobulin V-set domain
P98095	Fibulin-2 OS=Homo sapiens OX=9606 GN=FBLN2 PE=1 SV=2	FBLN2	1.719	0.0185063	Up	126.57	18.8	17	17	35	extracellular	K17307	FBLN1_2; fibulin 1/2		GO:0010810 regulation of cell-substrate adhesion; GO:0010811 positive regulation of cell-substrate adhesion; GO:0030155 regulation of cell adhesion; GO:0045785 positive regulation of cell adhesion; GO:0048518 positive regulation of biological process; GO:0050789 regulation of biological process; GO:0065007 biological regulation;		GO:0005198 structural molecule activity; GO:0005201 extracellular matrix structural constituent; GO:0005488 binding; GO:0005509 calcium ion binding; GO:0043167 ion binding; GO:0043169 cation binding; GO:0046872 metal ion binding; GO:0050840 extracellular matrix binding;	PF01821; PF07645; PF12662	Anaphylotoxin-like domain; Calcium-binding EGF domain; Complement Clr-like EGF-like
Q96F07	Cytoplasmic FMR1-interacting protein 2 OS=Homo sapiens OX=9606 GN=CYFIP2 PE=1 SV=2	CYFIP2	1.332	0.0139368	Up	148.4	10.2	13	3	14	cytoplasm	K05749	CYFIP; cytoplasmic FMR1 interacting protein	map03013 RNA transport; map04810 Regulation of actin cytoskeleton; map05130 Pathogenic Escherichia coli infection
P06746	DNA polymerase beta OS=Homo sapiens OX=9606 GN=POLB PE=1 SV=3	POLB	0.767	0.0429707	Down	38.177	3	1	1	1	cytoplasm	K02330	POLB; DNA polymerase beta [EC:2.7.7.7 4.2.99.-]	map03410 Base excision repair; map05166 Human T-cell leukemia virus 1 infection; map05203 Viral carcinogenesis	GO:0002200 somatic diversification of immune receptors; GO:0002376 immune system process; GO:0002377 immunoglobulin production; GO:0002440 production of molecular mediator of immune response; GO:0002520 immune system development; GO:0002562 somatic diversification of immune receptors via germline recombination within a single locus; GO:0002566 somatic diversification of immune receptors via somat…	GO:0000228 nuclear chromosome; GO:0000793 condensed chromosome; GO:0000794 condensed nuclear chromosome; GO:0000795 synaptonemal complex; GO:0005622 intracellular; GO:0005623 cell; GO:0005634 nucleus; GO:0005654 nucleoplasm; GO:0005694 chromosome; GO:0005737 cytoplasm; GO:0005819 spindle; GO:0005856 cytoskeleton; GO:0005874 microtubule; GO:0005876 spindle microtubule; GO:0015630 microtubule cytos…	GO:0003676 nucleic acid binding; GO:0003677 DNA binding; GO:0003684 damaged DNA binding; GO:0003824 catalytic activity; GO:0003887 DNA-directed DNA polymerase activity; GO:0003906 DNA-(apurinic or apyrimidinic site) lyase activity; GO:0005488 binding; GO:0005515 protein binding; GO:0008017 microtubule binding; GO:0008092 cytoskeletal protein binding; GO:0015631 tubulin binding; GO:0016740 transfe…	PF10391	Fingers domain of DNA polymerase lambda
Q9Y2A9	N-acetyllactosaminide beta-1,3-N-acetylglucosaminyltransferase 3 OS=Homo sapiens OX=9606 GN=B3GNT3 PE=1 SV=2	B3GNT3	0.645	0.0261413	Down	42.534	1.9	1	1	1	extracellular	K07970	B3GNT3; beta-1,3-N-acetylglucosaminyltransferase 3 [EC:2.4.1.146 2.4.1.149]	map00601 Glycosphingolipid biosynthesis - lacto and neolacto series; map01100 Metabolic pathways	GO:0000271 polysaccharide biosynthetic process; GO:0005975 carbohydrate metabolic process; GO:0005976 polysaccharide metabolic process; GO:0006022 aminoglycan metabolic process; GO:0006023 aminoglycan biosynthetic process; GO:0006024 glycosaminoglycan biosynthetic process; GO:0006082 organic acid metabolic process; GO:0006464 cellular protein modification process; GO:0006486 protein glycosylation…	GO:0000139 Golgi membrane; GO:0005622 intracellular; GO:0005623 cell; GO:0005737 cytoplasm; GO:0005794 Golgi apparatus; GO:0005886 plasma membrane; GO:0005887 integral component of plasma membrane; GO:0012505 endomembrane system; GO:0016020 membrane; GO:0016021 integral component of membrane; GO:0031090 organelle membrane; GO:0031224 intrinsic component of membrane; GO:0031226 intrinsic component…	GO:0003824 catalytic activity; GO:0008194 UDP-glycosyltransferase activity; GO:0008375 acetylglucosaminyltransferase activity; GO:0008378 galactosyltransferase activity; GO:0008499 UDP-galactose:beta-N-acetylglucosamine beta-1,3-galactosyltransferase activity; GO:0008532 N-acetyllactosaminide beta-1,3-N-acetylglucosaminyltransferase activity; GO:0016740 transferase activity; GO:0016757 transferas…
Q96CG8	Collagen triple helix repeat-containing protein 1 OS=Homo sapiens OX=9606 GN=CTHRC1 PE=1 SV=1	CTHRC1	1.559	0.00921005	Up	26.224	13.2	3	3	6	extracellular				GO:0001503 ossification; GO:0001736 establishment of planar polarity; GO:0001738 morphogenesis of a polarized epithelium; GO:0001838 embryonic epithelial tube formation; GO:0001841 neural tube formation; GO:0001843 neural tube closure; GO:0002009 morphogenesis of an epithelium; GO:0006928 movement of cell or subcellular component; GO:0007154 cell communication; GO:0007164 establishment of tissue …	GO:0005576 extracellular region; GO:0005615 extracellular space; GO:0005622 intracellular; GO:0005623 cell; GO:0005737 cytoplasm; GO:0031012 extracellular matrix; GO:0044421 extracellular region part; GO:0044424 intracellular part; GO:0044464 cell part;	GO:0001664 G-protein coupled receptor binding; GO:0005102 receptor binding; GO:0005109 frizzled binding; GO:0005488 binding; GO:0005515 protein binding; GO:0017147 Wnt-protein binding;
O94768	Serine/threonine-protein kinase 17B OS=Homo sapiens OX=9606 GN=STK17B PE=1 SV=1	STK17B	1.466	0.0192665	Up	42.344	2.4	1	1	1	mitochondria	K08804	STK17; serine/threonine kinase 17 [EC:2.7.11.1]		GO:0006464 cellular protein modification process; GO:0006468 protein phosphorylation; GO:0006793 phosphorus metabolic process; GO:0006796 phosphate-containing compound metabolic process; GO:0006807 nitrogen compound metabolic process; GO:0006915 apoptotic process; GO:0007154 cell communication; GO:0007165 signal transduction; GO:0008152 metabolic process; GO:0008219 cell death; GO:0009987 cellula…	GO:0005622 intracellular; GO:0005623 cell; GO:0005634 nucleus; GO:0005856 cytoskeleton; GO:0015629 actin cytoskeleton; GO:0043226 organelle; GO:0043227 membrane-bounded organelle; GO:0043228 non-membrane-bounded organelle; GO:0043229 intracellular organelle; GO:0043231 intracellular membrane-bounded organelle; GO:0043232 intracellular non-membrane-bounded organelle; GO:0044424 intracellular part;…	GO:0000166 nucleotide binding; GO:0003824 catalytic activity; GO:0004672 protein kinase activity; GO:0004674 protein serine/threonine kinase activity; GO:0005488 binding; GO:0005524 ATP binding; GO:0008144 drug binding; GO:0016301 kinase activity; GO:0016740 transferase activity; GO:0016772 transferase activity, transferring phosphorus-containing groups; GO:0016773 phosphotransferase activity, al…	PF00069	Protein kinase domain
P41222	Prostaglandin-H2 D-isomerase OS=Homo sapiens OX=9606 GN=PTGDS PE=1 SV=1	PTGDS	2.858	0.0253952	Up	21.029	8.9	1	1	1	extracellular	K01830	PTGDS; prostaglandin-H2 D-isomerase [EC:5.3.99.2]	map00590 Arachidonic acid metabolism; map01100 Metabolic pathways	GO:0001516 prostaglandin biosynthetic process; GO:0001676 long-chain fatty acid metabolic process; GO:0006082 organic acid metabolic process; GO:0006629 lipid metabolic process; GO:0006631 fatty acid metabolic process; GO:0006633 fatty acid biosynthetic process; GO:0006636 unsaturated fatty acid biosynthetic process; GO:0006690 icosanoid metabolic process; GO:0006692 prostanoid metabolic process;…	GO:0005576 extracellular region; GO:0005615 extracellular space; GO:0005622 intracellular; GO:0005623 cell; GO:0005634 nucleus; GO:0005635 nuclear envelope; GO:0005737 cytoplasm; GO:0005783 endoplasmic reticulum; GO:0005789 endoplasmic reticulum membrane; GO:0005791 rough endoplasmic reticulum; GO:0005794 Golgi apparatus; GO:0012505 endomembrane system; GO:0016020 membrane; GO:0031090 organelle m…	GO:0003824 catalytic activity; GO:0004667 prostaglandin-D synthase activity; GO:0005488 binding; GO:0005501 retinoid binding; GO:0005504 fatty acid binding; GO:0008289 lipid binding; GO:0016853 isomerase activity; GO:0016860 intramolecular oxidoreductase activity; GO:0019840 isoprenoid binding; GO:0031406 carboxylic acid binding; GO:0033293 monocarboxylic acid binding; GO:0036094 small molecule b…	PF00061	Lipocalin / cytosolic fatty-acid binding protein family
O15269	Serine palmitoyltransferase 1 OS=Homo sapiens OX=9606 GN=SPTLC1 PE=1 SV=1	SPTLC1	0.74	0.0165654	Down	52.743	8	4	4	4	cytoplasm	K00654	SPT; serine palmitoyltransferase [EC:2.3.1.50]	map00600 Sphingolipid metabolism; map01100 Metabolic pathways; map04071 Sphingolipid signaling pathway	GO:0006066 alcohol metabolic process; GO:0006629 lipid metabolic process; GO:0006643 membrane lipid metabolic process; GO:0006644 phospholipid metabolic process; GO:0006665 sphingolipid metabolic process; GO:0006667 sphinganine metabolic process; GO:0006670 sphingosine metabolic process; GO:0006672 ceramide metabolic process; GO:0006684 sphingomyelin metabolic process; GO:0006686 sphingomyelin bi…	GO:0002178 palmitoyltransferase complex; GO:0005622 intracellular; GO:0005623 cell; GO:0005737 cytoplasm; GO:0005783 endoplasmic reticulum; GO:0005789 endoplasmic reticulum membrane; GO:0012505 endomembrane system; GO:0016020 membrane; GO:0017059 serine C-palmitoyltransferase complex; GO:0031211 endoplasmic reticulum palmitoyltransferase complex; GO:0031984 organelle subcompartment; GO:0032991 ma…	GO:0003824 catalytic activity; GO:0004758 serine C-palmitoyltransferase activity; GO:0016408 C-acyltransferase activity; GO:0016409 palmitoyltransferase activity; GO:0016454 C-palmitoyltransferase activity; GO:0016740 transferase activity; GO:0016746 transferase activity, transferring acyl groups; GO:0016747 transferase activity, transferring acyl groups other than amino-acyl groups;	PF00155	Aminotransferase class I and II
Q7Z392	Trafficking protein particle complex subunit 11 OS=Homo sapiens OX=9606 GN=TRAPPC11 PE=1 SV=2	TRAPPC11	2.034	0.0188987	Up	128.88	1.8	2	2	2	cytoplasm	K20308	TRAPPC11; trafficking protein particle complex subunit 11		GO:0006810 transport; GO:0006888 ER to Golgi vesicle-mediated transport; GO:0006996 organelle organization; GO:0007030 Golgi organization; GO:0009987 cellular process; GO:0010256 endomembrane system organization; GO:0016043 cellular component organization; GO:0016192 vesicle-mediated transport; GO:0022607 cellular component assembly; GO:0043933 macromolecular complex subunit organization; GO:0044…	GO:0005622 intracellular; GO:0005623 cell; GO:0005737 cytoplasm; GO:0005794 Golgi apparatus; GO:0005829 cytosol; GO:0012505 endomembrane system; GO:0030008 TRAPP complex; GO:0032991 macromolecular complex; GO:0043226 organelle; GO:0043227 membrane-bounded organelle; GO:0043229 intracellular organelle; GO:0043231 intracellular membrane-bounded organelle; GO:0044424 intracellular part; GO:0044444 c…	GO:0005085 guanyl-nucleotide exchange factor activity; GO:0005088 Ras guanyl-nucleotide exchange factor activity; GO:0005488 binding; GO:0005515 protein binding; GO:0017016 Ras GTPase binding; GO:0017112 Rab guanyl-nucleotide exchange factor activity; GO:0017137 Rab GTPase binding; GO:0019899 enzyme binding; GO:0031267 small GTPase binding; GO:0051020 GTPase binding; GO:0098772 molecular function…	PF12742	Gryzun, putative Golgi trafficking
P07951	Tropomyosin beta chain OS=Homo sapiens OX=9606 GN=TPM2 PE=1 SV=1	TPM2	1.916	0.000743515	Up	32.85	39.8	14	1	1	cytoplasm	K10374	TPM2; tropomyosin 2	map04260 Cardiac muscle contraction; map04261 Adrenergic signaling in cardiomyocytes; map05410 Hypertrophic cardiomyopathy (HCM); map05414 Dilated cardiomyopathy (DCM)	GO:0003008 system process; GO:0003012 muscle system process; GO:0006936 muscle contraction; GO:0006996 organelle organization; GO:0007010 cytoskeleton organization; GO:0007015 actin filament organization; GO:0009987 cellular process; GO:0016043 cellular component organization; GO:0030029 actin filament-based process; GO:0030036 actin cytoskeleton organization; GO:0032501 multicellular organismal …	GO:0005622 intracellular; GO:0005623 cell; GO:0005737 cytoplasm; GO:0005856 cytoskeleton; GO:0005862 muscle thin filament tropomyosin; GO:0005865 striated muscle thin filament; GO:0005884 actin filament; GO:0015629 actin cytoskeleton; GO:0030016 myofibril; GO:0030017 sarcomere; GO:0036379 myofilament; GO:0043226 organelle; GO:0043228 non-membrane-bounded organelle; GO:0043229 intracellular organe…	GO:0003779 actin binding; GO:0005198 structural molecule activity; GO:0005488 binding; GO:0005515 protein binding; GO:0008092 cytoskeletal protein binding; GO:0008307 structural constituent of muscle; GO:0042802 identical protein binding; GO:0042803 protein homodimerization activity; GO:0044877 macromolecular complex binding; GO:0046982 protein heterodimerization activity; GO:0046983 protein dime…
Q5VUA4	Zinc finger protein 318 OS=Homo sapiens OX=9606 GN=ZNF318 PE=1 SV=2	ZNF318	2.036	0.000311654	Up	251.11	0.4	1	1	1	nucleus				GO:0006355 regulation of transcription, DNA-templated; GO:0009889 regulation of biosynthetic process; GO:0009890 negative regulation of biosynthetic process; GO:0009891 positive regulation of biosynthetic process; GO:0009892 negative regulation of metabolic process; GO:0009893 positive regulation of metabolic process; GO:0010468 regulation of gene expression; GO:0010556 regulation of macromolecul…	GO:0005622 intracellular; GO:0005623 cell; GO:0005634 nucleus; GO:0005654 nucleoplasm; GO:0005737 cytoplasm; GO:0005829 cytosol; GO:0031974 membrane-enclosed lumen; GO:0031981 nuclear lumen; GO:0043226 organelle; GO:0043227 membrane-bounded organelle; GO:0043229 intracellular organelle; GO:0043231 intracellular membrane-bounded organelle; GO:0043233 organelle lumen; GO:0044422 organelle part; GO:…	GO:0005488 binding; GO:0005515 protein binding; GO:0042802 identical protein binding; GO:0042803 protein homodimerization activity; GO:0046982 protein heterodimerization activity; GO:0046983 protein dimerization activity;
O95159	Zinc finger protein-like 1 OS=Homo sapiens OX=9606 GN=ZFPL1 PE=1 SV=2	ZFPL1	1.357	0.00668457	Up	34.114	7.7	2	2	2	nucleus				GO:0006355 regulation of transcription, DNA-templated; GO:0009889 regulation of biosynthetic process; GO:0010468 regulation of gene expression; GO:0010556 regulation of macromolecule biosynthetic process; GO:0019219 regulation of nucleobase-containing compound metabolic process; GO:0019222 regulation of metabolic process; GO:0031323 regulation of cellular metabolic process; GO:0031326 regulation …	GO:0005622 intracellular; GO:0005623 cell; GO:0005634 nucleus; GO:0005737 cytoplasm; GO:0005794 Golgi apparatus; GO:0012505 endomembrane system; GO:0043226 organelle; GO:0043227 membrane-bounded organelle; GO:0043229 intracellular organelle; GO:0043231 intracellular membrane-bounded organelle; GO:0044424 intracellular part; GO:0044444 cytoplasmic part; GO:0044464 cell part;	GO:0003676 nucleic acid binding; GO:0003677 DNA binding; GO:0005488 binding; GO:0008270 zinc ion binding; GO:0043167 ion binding; GO:0043169 cation binding; GO:0046872 metal ion binding; GO:0046914 transition metal ion binding; GO:0097159 organic cyclic compound binding; GO:1901363 heterocyclic compound binding;
Q15661	Tryptase alpha/beta-1 OS=Homo sapiens OX=9606 GN=TPSAB1 PE=1 SV=1	TPSAB1	0.613	0.00840788	Down	30.515	29.1	8	8	21	extracellular	K01340	E3.4.21.59; tryptase [EC:3.4.21.59]	map05164 Influenza A	GO:0006508 proteolysis; GO:0006807 nitrogen compound metabolic process; GO:0006950 response to stress; GO:0006952 defense response; GO:0006954 inflammatory response; GO:0008152 metabolic process; GO:0009987 cellular process; GO:0016043 cellular component organization; GO:0019538 protein metabolic process; GO:0022411 cellular component disassembly; GO:0022617 extracellular matrix disassembly; GO:0…	GO:0005576 extracellular region;	GO:0003824 catalytic activity; GO:0004175 endopeptidase activity; GO:0004252 serine-type endopeptidase activity; GO:0005488 binding; GO:0005539 glycosaminoglycan binding; GO:0008201 heparin binding; GO:0008233 peptidase activity; GO:0008236 serine-type peptidase activity; GO:0016787 hydrolase activity; GO:0017171 serine hydrolase activity; GO:0043167 ion binding; GO:0043168 anion binding; GO:0070…	PF00089	Trypsin
Q9H1E3	Nuclear ubiquitous casein and cyclin-dependent kinase substrate 1 OS=Homo sapiens OX=9606 GN=NUCKS1 PE=1 SV=1	NUCKS1	1.326	0.0143986	Up	27.296	10.7	3	3	5	nucleus				GO:0000724 double-strand break repair via homologous recombination; GO:0000725 recombinational repair; GO:0001678 cellular glucose homeostasis; GO:0006139 nucleobase-containing compound metabolic process; GO:0006259 DNA metabolic process; GO:0006260 DNA replication; GO:0006261 DNA-dependent DNA replication; GO:0006275 regulation of DNA replication; GO:0006281 DNA repair; GO:0006302 double-strand …	GO:0000228 nuclear chromosome; GO:0000785 chromatin; GO:0000790 nuclear chromatin; GO:0005622 intracellular; GO:0005623 cell; GO:0005634 nucleus; GO:0005694 chromosome; GO:0005730 nucleolus; GO:0005737 cytoplasm; GO:0031974 membrane-enclosed lumen; GO:0031981 nuclear lumen; GO:0043226 organelle; GO:0043227 membrane-bounded organelle; GO:0043228 non-membrane-bounded organelle; GO:0043229 intracell…	GO:0000981 RNA polymerase II transcription factor activity, sequence-specific DNA binding; GO:0000982 transcription factor activity, RNA polymerase II core promoter proximal region sequence-specific binding; GO:0001077 transcriptional activator activity, RNA polymerase II core promoter proximal region sequence-specific binding; GO:0001228 transcriptional activator activity, RNA polymerase II tran…
P0DJI9	Serum amyloid A-2 protein OS=Homo sapiens OX=9606 GN=SAA2 PE=1 SV=1	SAA2	0.399	0.0493372	Down	13.527	7.4	1	1	1	extracellular	K17310	SAA; serum amyloid A protein		GO:0000187 activation of MAPK activity; GO:0001775 cell activation; GO:0001817 regulation of cytokine production; GO:0001819 positive regulation of cytokine production; GO:0001932 regulation of protein phosphorylation; GO:0001934 positive regulation of protein phosphorylation; GO:0002376 immune system process; GO:0002526 acute inflammatory response; GO:0002791 regulation of peptide secretion; GO:…	GO:0005576 extracellular region; GO:0005615 extracellular space; GO:0005622 intracellular; GO:0005623 cell; GO:0005737 cytoplasm; GO:0005856 cytoskeleton; GO:0005874 microtubule; GO:0005881 cytoplasmic microtubule; GO:0015630 microtubule cytoskeleton; GO:0030139 endocytic vesicle; GO:0031410 cytoplasmic vesicle; GO:0031974 membrane-enclosed lumen; GO:0031982 vesicle; GO:0031983 vesicle lumen; GO:…	GO:0001664 G-protein coupled receptor binding; GO:0005102 receptor binding; GO:0005488 binding; GO:0005515 protein binding; GO:0030545 receptor regulator activity; GO:0042056 chemoattractant activity; GO:0048018 receptor agonist activity; GO:0098772 molecular function regulator;
Q7Z404	Transmembrane channel-like protein 4 OS=Homo sapiens OX=9606 GN=TMC4 PE=1 SV=3	TMC4	1.356	0.0166655	Up	79.207	4.4	3	3	3	plasma membrane	K21988	TMC; transmembrane channel-like protein					PF07810	TMC domain
Q7Z2W9	39S ribosomal protein L21, mitochondrial OS=Homo sapiens OX=9606 GN=MRPL21 PE=1 SV=2	MRPL21	0.599	0.0186994	Down	22.814	10.2	1	1	1	mitochondria	K02888	RP-L21, MRPL21, rplU; large subunit ribosomal protein L21	map03010 Ribosome	GO:0006412 translation; GO:0006414 translational elongation; GO:0006415 translational termination; GO:0006518 peptide metabolic process; GO:0006807 nitrogen compound metabolic process; GO:0008152 metabolic process; GO:0009058 biosynthetic process; GO:0009059 macromolecule biosynthetic process; GO:0009987 cellular process; GO:0010467 gene expression; GO:0016043 cellular component organization; GO:…	GO:0000313 organellar ribosome; GO:0000315 organellar large ribosomal subunit; GO:0005622 intracellular; GO:0005623 cell; GO:0005737 cytoplasm; GO:0005739 mitochondrion; GO:0005740 mitochondrial envelope; GO:0005743 mitochondrial inner membrane; GO:0005759 mitochondrial matrix; GO:0005761 mitochondrial ribosome; GO:0005762 mitochondrial large ribosomal subunit; GO:0005840 ribosome; GO:0015934 lar…	GO:0003735 structural constituent of ribosome; GO:0005198 structural molecule activity;
Q9H7M9	V-type immunoglobulin domain-containing suppressor of T-cell activation OS=Homo sapiens OX=9606 GN=VSIR PE=1 SV=3	VSIR	0.707	0.0383248	Down	33.908	2.6	1	1	1	plasma membrane	K23268	VSIR, VISTA; V-type immunoglobulin domain-containing suppressor of T-cell activation	map04514 Cell adhesion molecules (CAMs)	GO:0001817 regulation of cytokine production; GO:0001818 negative regulation of cytokine production; GO:0002682 regulation of immune system process; GO:0002683 negative regulation of immune system process; GO:0002694 regulation of leukocyte activation; GO:0002695 negative regulation of leukocyte activation; GO:0002697 regulation of immune effector process; GO:0002698 negative regulation of immune…	GO:0005623 cell; GO:0005886 plasma membrane; GO:0009897 external side of plasma membrane; GO:0009986 cell surface; GO:0016020 membrane; GO:0044425 membrane part; GO:0044459 plasma membrane part; GO:0044464 cell part; GO:0071944 cell periphery; GO:0098552 side of membrane;	GO:0005488 binding; GO:0005515 protein binding; GO:0042802 identical protein binding;	PF07686	Immunoglobulin V-set domain
